# Supplementary material
Source: Royal Society of Chemistry journal article supplement (doi:10.1039/d6en00029k)
Supplement: d6en00029k1.pdf [file d6en00029k1.pdf]

## Supporting information

### Sulfur poisoning mechanism of nanostructured Fe-Mn spinel catalysts for low-temperature NH<sub>3</sub>-SCR

Yujia Tang<sup>2</sup>, Jiaxiu Guo<sup>1,3,4,\*</sup>, Xueke Shi<sup>2</sup>, Xiaoxiong Liu<sup>2</sup>

1. College of Carbon Neutrality Future Technology, Sichuan University, Chengdu 610065, Sichuan, China

2. College of Architecture and Environment, Sichuan University, Chengdu 610065, China

3. National Engineering Research Center for Flue Gas Desulfurization, Chengdu 610065, China

4. Industrial Technology Research Institute, Sichuan University, Yibin, 644004, China

\*Corresponding author: Jiaxiu Guo; E-mail: guojiaxiu@scu.edu.cn (J. Guo).

## Text A

X-ray diffraction (XRD) patterns were recorded on a Rigaku Ultima IV diffractometer using Cu K $\alpha$  radiation (40 kV, 40 mA) over a  $2\theta$  range of 5–90° at a scan rate of 10°/min.

N<sub>2</sub> adsorption-desorption isotherms were measured at liquid N<sub>2</sub> temperature (–196°C) using a Micromeritics ASAP 2460 analyzer. Prior to measurement, samples were outgassed at 300°C. The specific surface area and pore size distribution of all catalysts were determined using the BET equation and BJH method, respectively.

X-ray photoelectron spectroscopy (XPS) was performed using a Thermo Scientific K-Alpha spectrometer with Al K $\alpha$  radiation ( $h\nu = 1486.68$  eV) as the excitation source to determine the binding energies of Fe 2p, Mn 2p, Mn 3s, S 2p and

O 1s. The C 1s line at 284.8 eV was used as a reference for binding energy calibration.

Thermogravimetric analysis (TGA) was conducted using a DSC-TGA instrument (TA Q600). Samples were heated under nitrogen atmosphere (60 mL/min) from room temperature to 950°C at a heating rate of 10°C/min.

Temperature-programmed characterization was performed using a chemisorption analyzer (VDSorb-91i, China) equipped with a thermal conductivity detector (TCD). For temperature-programmed reduction (H<sub>2</sub>-TPR), approximately 100 mg of catalyst was loaded into a microreactor and pretreated under high-purity He at 300°C for 60 min, then cooled to 50°C. The gas was then switched to a 5% H<sub>2</sub>/He mixture. After baseline stabilization, the catalyst was heated to 750°C at a heating rate of 10°C/min. H<sub>2</sub> consumption was monitored online by TCD using copper oxide as a standard. CuO was used as a standard to estimate H<sub>2</sub> consumption. The H<sub>2</sub> consumption is calculated as following:

$$H_2 \text{ consumption} = \frac{m_{CuO} \times A_{catalyst}}{M_{CuO} \times A_{CuO}}$$

Here,  $m_{CuO}$  is the quality of CuO;  $M_{CuO}$  is the molar mass of CuO;  $A_{catalyst}$  is the H<sub>2</sub> consumption peak area of catalyst; and  $A_{CuO}$  is the H<sub>2</sub> consumption peak area of CuO.

Temperature-programmed desorption (TPD) experiments were conducted for NH<sub>3</sub>, O<sub>2</sub>, NO, and SO<sub>2</sub> (NH<sub>3</sub>-TPD, O<sub>2</sub>-TPD, NO-TPD, and SO<sub>2</sub>-TPD). In a typical procedure, approximately 100 mg of catalyst was pretreated in high-purity He at 300°C for 1 h and then cooled to 50°C. The catalyst was then exposed to the respective gas mixture (1% NH<sub>3</sub>/N<sub>2</sub> for NH<sub>3</sub>-TPD, O<sub>2</sub> for O<sub>2</sub>-TPD, 1% NO/N<sub>2</sub> for NO-TPD, or 0.1% SO<sub>2</sub>/N<sub>2</sub> for SO<sub>2</sub>-TPD) for 1 h, followed by purging with high-purity He (20 mL/min) to remove weakly adsorbed species. After baseline stabilization, the catalyst was heated from 50 to 750°C at a heating rate of 10°C/min. The effluent gas was analyzed using a thermal conductivity detector (TCD).

In-situ diffuse reflectance infrared Fourier transform spectroscopy (in-situ DRIFTS) experiments were performed using a Nicolet iS50 FTIR spectrometer (Thermo Fisher Scientific) equipped with an MCT detector. For the SCR experiment,

catalysts were pretreated with high-purity N<sub>2</sub> at 300°C for 1 h, then cooled to 120°C.

The gas feeds used for the experiments were: 500 ppm NH<sub>3</sub>/N<sub>2</sub>, 500 ppm NO + 5 vol.%

O<sub>2</sub>/N<sub>2</sub>, or 100 ppm SO<sub>2</sub> + 5 vol.% O<sub>2</sub>/N<sub>2</sub>.

Table S1 Cell parameters and Crystalline size of Catalysts.

| Catalysts                                                   | Cell parameters (Å) |        |        | Crystalline size (nm) |
|-------------------------------------------------------------|---------------------|--------|--------|-----------------------|
|                                                             | a                   | b      | c      |                       |
| Mn <sub>3</sub> O <sub>4</sub>                              | 5.7598              | 5.7598 | 9.4520 | 43.1                  |
| Fe <sub>0.2</sub> Mn <sub>2.8</sub> O <sub>4</sub>          | 5.7638              | 5.7638 | 9.4334 | 28.8                  |
| Fe <sub>0.4</sub> Mn <sub>2.6</sub> O <sub>4</sub>          | 5.7615              | 5.7615 | 9.4275 | 27.0                  |
| Fe <sub>0.6</sub> Mn <sub>2.4</sub> O <sub>4</sub>          | 5.7692              | 5.7692 | 9.3919 | 17.3                  |
| Fe <sub>0.8</sub> Mn <sub>2.2</sub> O <sub>4</sub>          | 5.7678              | 5.7678 | 9.4044 | 16.8                  |
| FeMn <sub>2</sub> O <sub>4</sub>                            | 5.7819              | 5.7819 | 9.3634 | 8.4                   |
| Mn <sub>3</sub> O <sub>4</sub> -120                         | 5.7614              | 5.7614 | 9.4527 | 38.3                  |
| Fe <sub>0.8</sub> Mn <sub>2.2</sub> O <sub>4</sub> -<br>120 | 5.7676              | 5.7676 | 9.3863 | 16.9                  |

Table S2 H<sub>2</sub> uptake form H<sub>2</sub>-TPR.

| Catalysts                                          | Total H <sub>2</sub> uptake (mmol/g) |
|----------------------------------------------------|--------------------------------------|
|                                                    | 150-650°C                            |
| Mn <sub>3</sub> O <sub>4</sub>                     | 1.39                                 |
| Fe <sub>0.8</sub> Mn <sub>2.2</sub> O <sub>4</sub> | 1.47                                 |

Table S3 The peak areas of Mn<sub>3</sub>O<sub>4</sub> and Fe<sub>0.8</sub>Mn<sub>2.2</sub>O<sub>4</sub> from NO-TPD, O<sub>2</sub>-TPD and SO<sub>2</sub>-TPD.

| Catalysts                                          | NO-TPD   |         | O <sub>2</sub> -TPD | SO <sub>2</sub> -TPD |
|----------------------------------------------------|----------|---------|---------------------|----------------------|
|                                                    | 80-300°C | 300-600 | <300°C              | 80-750°C             |
| Mn <sub>3</sub> O <sub>4</sub>                     | 369.34   | 403.95  | 211.68              | 1153.20              |
| Fe <sub>0.8</sub> Mn <sub>2.2</sub> O <sub>4</sub> | 444.36   | 711.72  | 231.56              | 2974.90              |

Table S4 The peak areas of  $\text{Mn}_3\text{O}_4$ ,  $\text{Mn}_3\text{O}_4\text{-120}$ ,  $\text{Fe}_{0.8}\text{Mn}_{2.2}\text{O}_4$  and  $\text{Fe}_{0.8}\text{Mn}_{2.2}\text{O}_4\text{-120}$  from  $\text{NH}_3\text{-TPD}$ .

| Catalysts                                             | $\text{NH}_3\text{-TPD}$ |           |
|-------------------------------------------------------|--------------------------|-----------|
|                                                       | 80-300°C                 | 300-600°C |
| $\text{Mn}_3\text{O}_4$                               | 107.93                   | 310.23    |
| $\text{Mn}_3\text{O}_4\text{-120}$                    | 84.13                    | 193.32    |
| $\text{Fe}_{0.8}\text{Mn}_{2.2}\text{O}_4$            | 281.60                   | 403.10    |
| $\text{Fe}_{0.8}\text{Mn}_{2.2}\text{O}_4\text{-120}$ | 186.03                   | 541.94    |

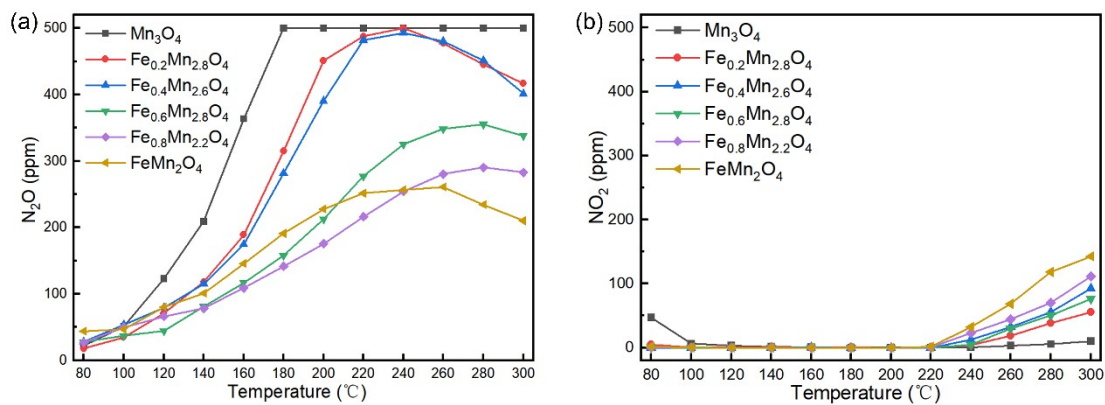

Fig. S1 (a) Concentration of  $N_2O$  and (b)  $NO_2$  produced.

Fig. S2 TG curves of  $Mn_3O_4$  (a),  $Fe_{0.8}Mn_{2.2}O_4$  (b),  $Mn_3O_4$ -120 (c),  $Fe_{0.8}Mn_{2.2}O_4$  (d).

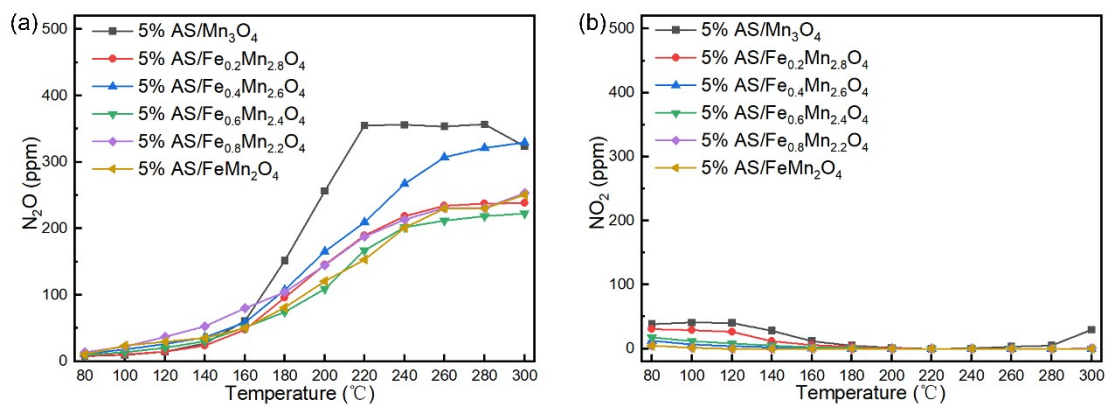

Fig. S3 (a) Concentration of  $N_2O$  and (b)  $NO_2$  produced

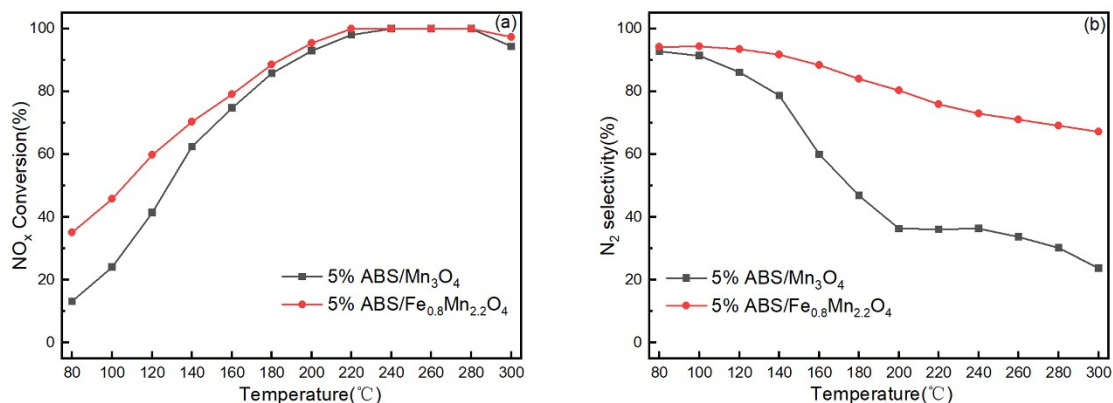

Fig. S4 (a) NH<sub>3</sub>-SCR activity; (b) N<sub>2</sub> selectivity; Reaction condition: 500 ppm NO, 500 ppm NH<sub>3</sub>, 5 vol% O<sub>2</sub> and balance as N<sub>2</sub>; A total flow rate of 500 mL/min and GHSV at 30, 000 h<sup>-1</sup>.

The results are similar to those observed with AS deposition. Compared with pure Mn<sub>3</sub>O<sub>4</sub>, Fe<sub>0.8</sub>Mn<sub>2.2</sub>O<sub>4</sub> exhibits improved low-temperature activity and enhanced high-temperature N<sub>2</sub> selectivity.

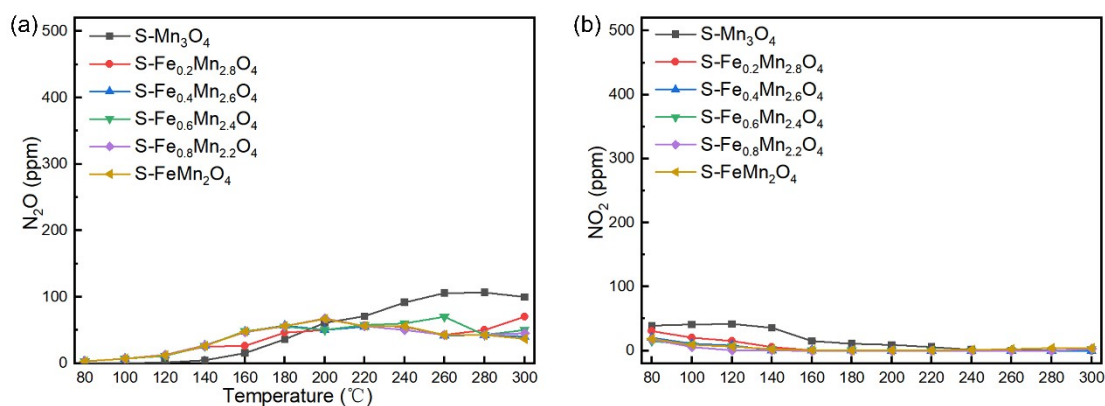

Fig. S5 (a) Concentration of N<sub>2</sub>O and (b) NO<sub>2</sub> produced.

Fig. S6 TG curves of 5%ABS/Mn<sub>3</sub>O<sub>4</sub> (a), S-Mn<sub>3</sub>O<sub>4</sub> (c), 5%ABS/Fe<sub>0.8</sub>Mn<sub>2.2</sub>O<sub>4</sub> (b) and S-Fe<sub>0.8</sub>Mn<sub>2.2</sub>O<sub>4</sub> (d).

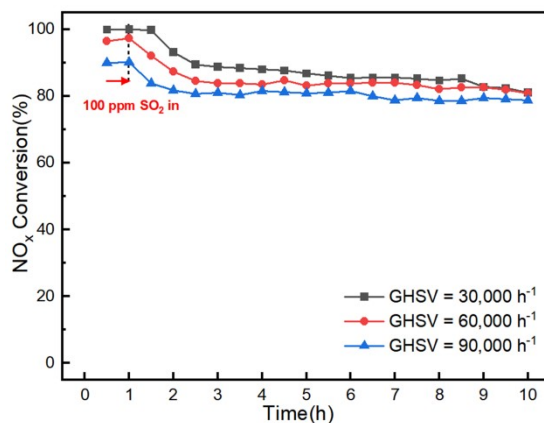

Fig. S7. SO<sub>2</sub> resistance lifetime test of the Fe<sub>0.8</sub>Mn<sub>2.2</sub>O<sub>4</sub> catalyst at 120 °C under high GHSV.

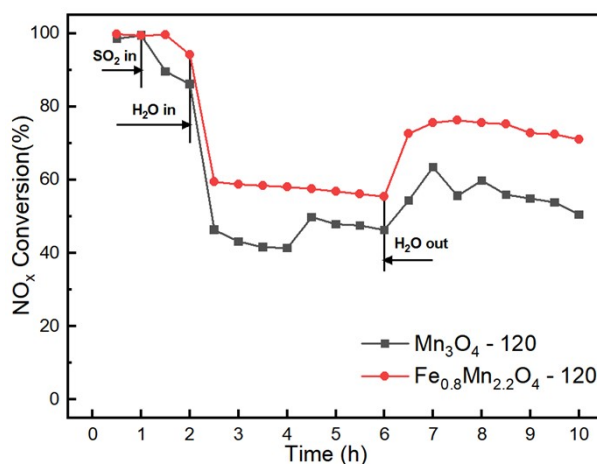

Fig. S8 Effect of H<sub>2</sub>O on NO<sub>x</sub> conversion over Mn<sub>3</sub>O<sub>4</sub> and Fe<sub>0.8</sub>Mn<sub>2.2</sub>O<sub>4</sub> at 120 °C. Reaction conditions: 500 ppm NO, 500 ppm NH<sub>3</sub>, 5% O<sub>2</sub>, 100 ppm SO<sub>2</sub> (when used), 10% H<sub>2</sub>O (when used), N<sub>2</sub> balance, GHSV = 30,000 h<sup>-1</sup>.

The effect of H<sub>2</sub>O on catalytic performance was evaluated at 120 °C under the following sequence: 1-10 h with 100 ppm SO<sub>2</sub>, 2-6 h with 10 vol% H<sub>2</sub>O, and 6-10 h without H<sub>2</sub>O (Fig. S8). Fe<sub>0.8</sub>Mn<sub>2.2</sub>O<sub>4</sub> exhibited superior water tolerance, maintaining 55% conversion at 6 h and rapidly recovering to 71% upon H<sub>2</sub>O removal. In contrast, Mn<sub>3</sub>O<sub>4</sub> dropped to 46% at 6 h and only recovered to 50% at 10 h, indicating

irreversible deactivation by water vapor.

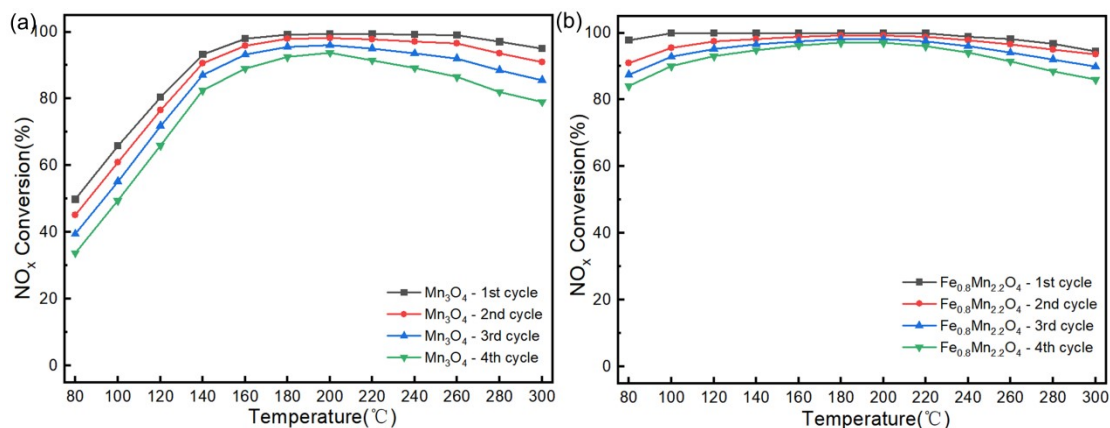

Figure S9. Cycling stability tests over four consecutive cycles: (a) Mn<sub>3</sub>O<sub>4</sub>, (b) Fe<sub>0.8</sub>Mn<sub>2.2</sub>O<sub>4</sub>. Reaction conditions: 500 ppm NO, 500 ppm NH<sub>3</sub>, 5% O<sub>2</sub>, N<sub>2</sub> balance, GHSV = 30,000 h<sup>-1</sup>, temperature range 80-300 °C.

Cycling stability was evaluated over four consecutive cycles (80-300 °C) with N<sub>2</sub> purge between cycles (Figs. S9). Fe<sub>0.8</sub>Mn<sub>2.2</sub>O<sub>4</sub> showed stable performance with minimal deactivation, while Mn<sub>3</sub>O<sub>4</sub> exhibited more pronounced activity loss, confirming the beneficial role of Fe doping in enhancing catalyst durability.

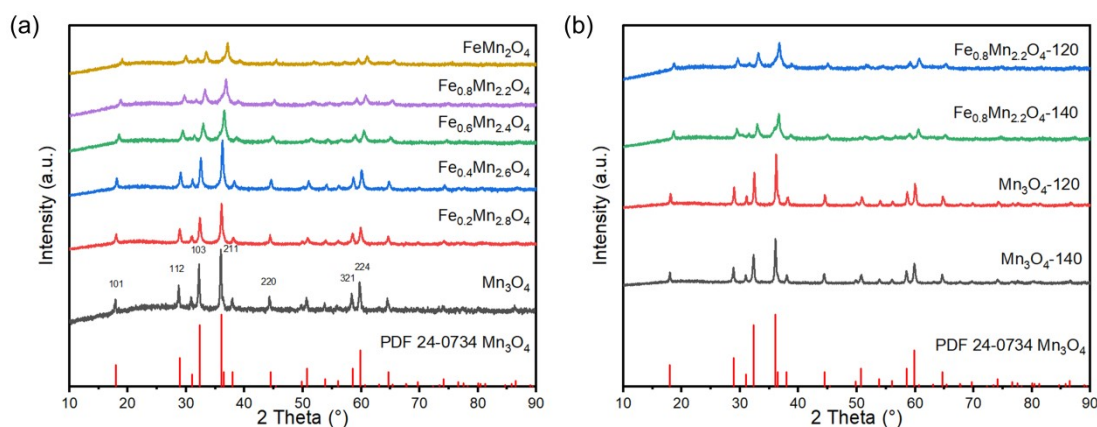

Fig. S10 (a) XRD patterns of Fe<sub>x</sub>Mn<sub>3-x</sub>O<sub>4</sub> catalysts (b) XRD patterns of Mn<sub>3</sub>O<sub>4</sub>-120, Mn<sub>3</sub>O<sub>4</sub>-140, Fe<sub>0.8</sub>Mn<sub>2.2</sub>O<sub>4</sub>-120 and Fe<sub>0.8</sub>Mn<sub>2.2</sub>O<sub>4</sub>-140.

Fig.S10 (a) shows the XRD patterns of the Fe<sub>x</sub>Mn<sub>3-x</sub>O<sub>4</sub> catalysts. It can be found

that all samples exhibit good correspondence with the hausmannite  $\text{Mn}_3\text{O}_4$  phase (JCPDS: #24-0734). Fig. S8(b) shows the XRD patterns of  $\text{Mn}_3\text{O}_4$  and  $\text{Fe}_{0.8}\text{Mn}_{2.2}\text{O}_4$  tested at 140 °C and 120 °C. After 9 hours of SCR reaction with  $\text{SO}_2$  at different temperatures, no diffraction peaks belonging to sulfate species were observed. This indicates that no bulk sulfate species have formed, and the sulfate species are highly dispersed or exist as very small particles on the catalyst surface.

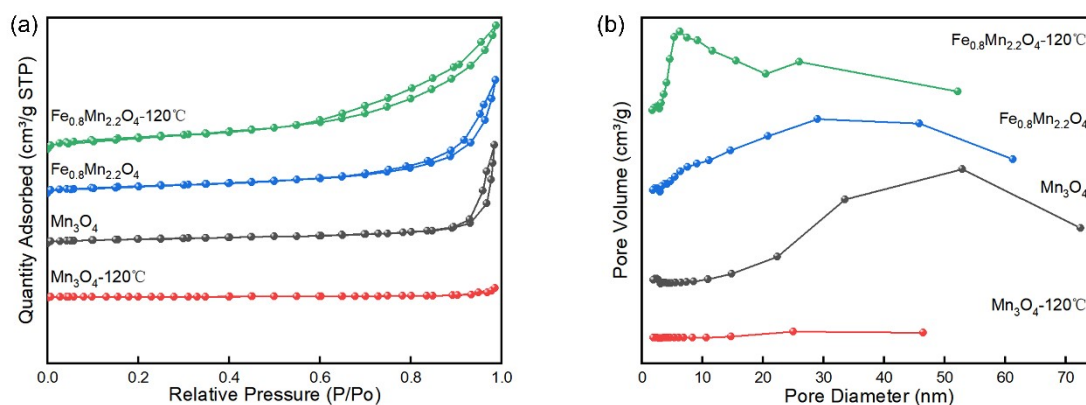

Fig. S11 Nitrogen adsorption-desorption curves; (b) Pore size distribution curves.

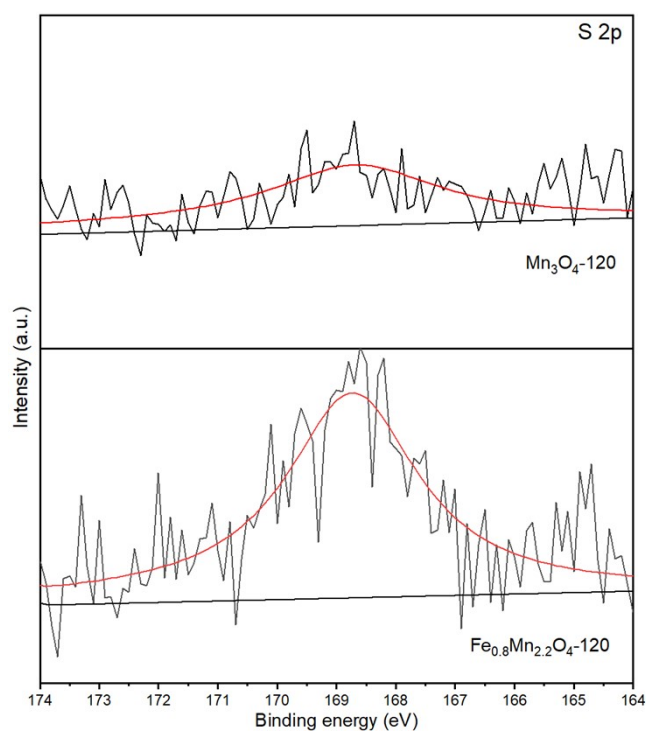

Fig. S12 XPS S 2p spectra of sulfated catalysts.

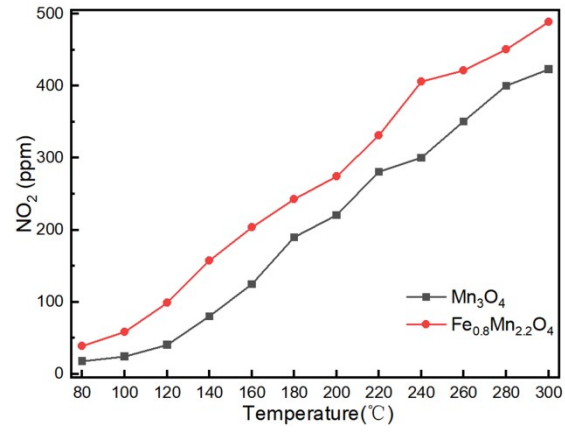

Fig. S13 NO oxidation performance over Mn<sub>3</sub>O<sub>4</sub> and Fe<sub>0.8</sub>Mn<sub>2.2</sub>O<sub>4</sub> catalysts.
